# Supplementary material
Source: PubMed Central journal article supplement (PMC10918513)
Supplement: Supplementary_Data.pdf [file Supplementary_Data.pdf]

**Table SI.** Summary of patients with MSO with synchronous primary thyroid cancer in the neck.

| First author(s), year             | No. | Age, years | Country of publication | Pathology                                              | Primary treatment                                              | Follow-up                                                                                                                                                                             | (Refs.) |
|-----------------------------------|-----|------------|------------------------|--------------------------------------------------------|----------------------------------------------------------------|---------------------------------------------------------------------------------------------------------------------------------------------------------------------------------------|---------|
| Dardik <i>et al</i> , 1999        | 1   | 39         | USA                    | FTC (ovary);<br>PTC (0.2 cm, pT1) in neck              | RSO                                                            | Recurrence at peritoneum, omentum and hernia sac at 0.6 years, treated with TH + LSO + omentectomy + tumor resection,<br>TT, RAI (150.0 mCi) and EBRT (5,040.0 cGy); NED at 6.0 years | (12)    |
| Janszen <i>et al</i> , 2008       | 2   | 52         | Netherlands            | FTC, 10.0x8.0 cm (ovary);<br>PTC (0.3cm, pT1) in neck  | BSO; TT + RAI (5,550.0 MBq)                                    | NED at 2.0 years                                                                                                                                                                      | (13)    |
| Marti <i>et al</i> , 2012         | 3   | 44         | USA                    | PTC, 5.0 cm (ovary);<br>PTC (0.5 cm, pT3N1a) in neck   | TH + BSO + omentectomy + lymphadenectomy; TT + RAI (179.0 mCi) | NED at 9.0 months                                                                                                                                                                     | (14)    |
| Leite <i>et al</i> , 2013         | 4   | 78         | Portugal               | PTC, 10.0x9.0 cm (ovary);<br>PTC (small focal) in neck | USO (RSO)                                                      | NED, died of multiple myeloma at 2.0 years                                                                                                                                            | (15)    |
| Krishnamurthy <i>et al</i> , 2013 | 5   | 51         | India                  | FVPTC, 12.0x8.0 cm (ovary);<br>FVPTC (0.4 cm, pT1)     | TH + BSO + omentectomy + lymphadenectomy                       | NED at 0.5 years                                                                                                                                                                      | (16)    |

|                                   |    |    |          |                                                             |                                                          |                                                                                                            |      |
|-----------------------------------|----|----|----------|-------------------------------------------------------------|----------------------------------------------------------|------------------------------------------------------------------------------------------------------------|------|
|                                   |    |    |          | in neck                                                     |                                                          |                                                                                                            |      |
| Leong <i>et al</i> , 2013         | 6  | 42 | Canada   | PTC, 13.5 cm (ovary);<br>PTC in neck (pT3N1a)               | TH + BSO; TT + RAI<br>(150.0 mCi)                        | NED at 1.0 year                                                                                            | (17) |
| Brusca <i>et al</i> ,<br>2015     | 7  | 30 | Italy    | FVPTC, 10.0 cm<br>(ovary); PTC (0.2 cm,<br>pT1) in neck     | RSO; TT + RAI (30.0<br>mCi)                              | NED at 0.5 years                                                                                           | (18) |
| Ma <i>et al</i> , 2016            | 8  | 47 | USA      | FVPTC, 5.2 cm<br>(ovary);<br>FVPTC (0.7 cm, pT1)<br>in neck | TH + BSO;<br>TT + RAI                                    | NED at 3.0 years                                                                                           | (19) |
| Middelbeek <i>et al</i> ,<br>2017 | 9  | 55 | USA      | PTC, 15.0 cm (ovary);<br>FVPTC (1.2 cm, pT1)<br>in neck     | BSO; TT + RAI<br>(150.0 mCi, performed<br>before BSO)    | NED at 5.0 years                                                                                           | (20) |
| Gomes-Lima <i>et al</i> ,<br>2018 | 10 | 67 | USA      | PTC, 7.2 cm (ovary);<br>PTC (0.8 cm, pT1) in<br>neck        | BSO; TT + RAI (147.7<br>mCi)                             | NED at 5.0 years                                                                                           | (21) |
| Tzelepis <i>et al</i> ,<br>2019   | 11 | 32 | USA      | FVPTC, 6.0 cm<br>(ovary);<br>PTC (0.6 cm, pT3) in<br>neck   | LSO, right ovarian<br>cystectomy, partial<br>omentectomy | Recurrence at mesentery lymph nodes<br>at 5.0 months, treated with RAI (184.3<br>mCi);<br>NED at 1.5 years | (22) |
| Donato <i>et al</i> ,<br>2021     | 12 | 35 | Portugal | FVPTC, 8.0 cm<br>(ovary);<br>FVPTC (1.5 cm,                 | LSO, TT + RAI (100.0<br>mCi)                             | Slightly elevated TG (7.6-31.9ng/ml)<br>at 5.0 years without identified lesions,<br>successfully delivered | (23) |

|                         |    |    |       |                                                                       |                                                                    |                  |                   |
|-------------------------|----|----|-------|-----------------------------------------------------------------------|--------------------------------------------------------------------|------------------|-------------------|
|                         |    |    |       | pT1bN0) in neck                                                       |                                                                    |                  |                   |
| Seo <i>et al</i> , 2023 | 13 | 42 | USA   | PTC, 10.5 cm (ovary);<br>PTC (3.0 and 1.5 mm,<br>pT1N0M0) in the neck | LSO, TT + RAI (28.3<br>mCi; both presented<br>BRAF V600E mutation) | NED at 0.5 years | (24)              |
| Present case            | 14 | 44 | China | PTC, 5.7 cm (ovary);<br>FVPTC (0.5 cm,<br>pT1aN0) in neck             | LSO                                                                | NED at 4.0 years | Not<br>applicable |

FTC, follicular thyroid carcinoma; FVPTC, follicular variant of papillary thyroid carcinoma; L/R/BSO, left/right/bilateral salpingo-oophorectomy; TH, total hysterectomy; TG, thyroglobulin; TT, total thyroidectomy; RAI, radioiodine therapy; EBRT, external beam radiotherapy; NED, no evidence of disease.
